# Supplementary material for: Efficacy and Safety of Intranasal Ketamine for Acute Pain Management in the Emergency Setting: A Systematic Review and Meta-Analysis
Source: MDPI journal article supplement (doi:10.3390/jcm10173978), 2021-09-02
Supplement: s1 [file s1]

A

**Study ID**                      **Cases Total Prevalence 95% C.I.**  
**Agitation**

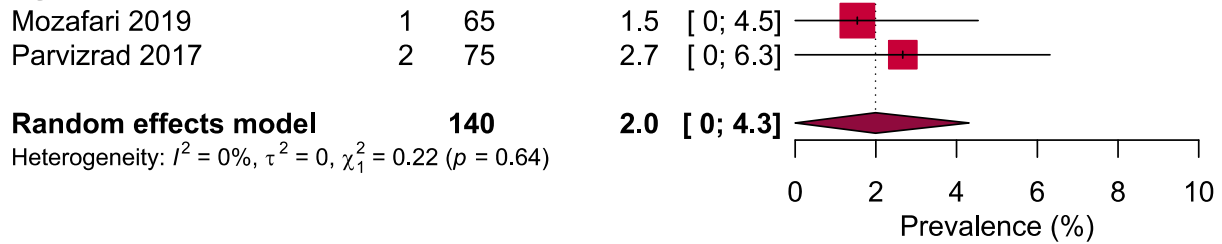

B

**Study ID**                      **Cases Total Prevalence 95% C.I.**  
**Difficulty concentrating**

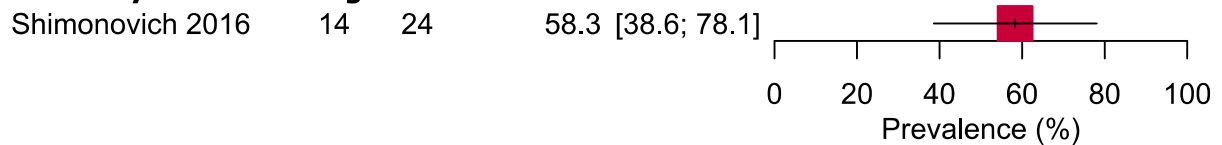

C

**Study ID**                      **Cases Total Prevalence 95% C.I.**  
**Confusion**

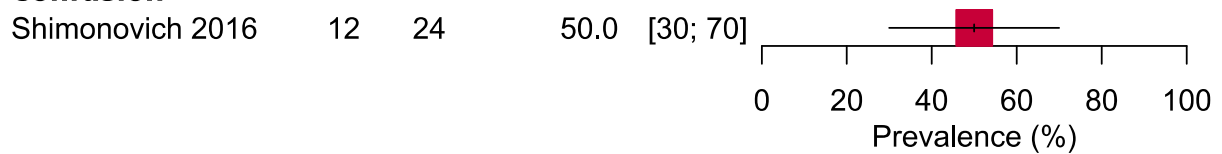

D

**Study ID**                      **Cases Total Prevalence 95% C.I.**  
**Emergence phenomenon**

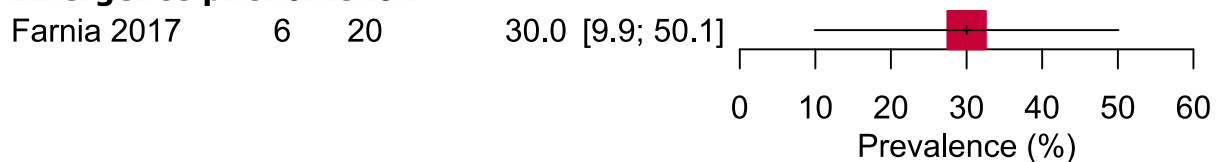

E

**Study ID**                      **Cases Total Prevalence 95% C.I.**  
**Dry mouth**

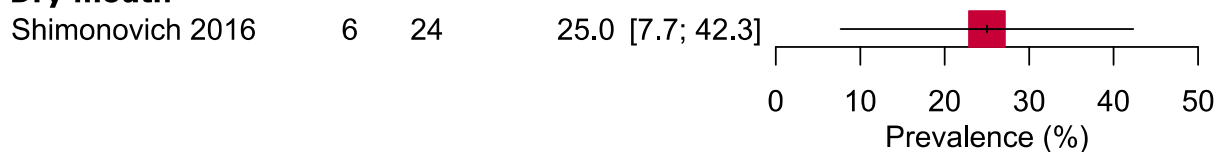

F

**Study ID**                      **Cases Total Prevalence 95% C.I.**  
**Fatigue**

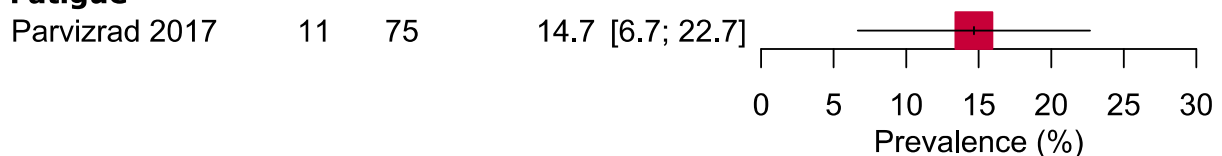

G

**Study ID Cases Total Prevalence 95% C.I.**  
**Disorientation**

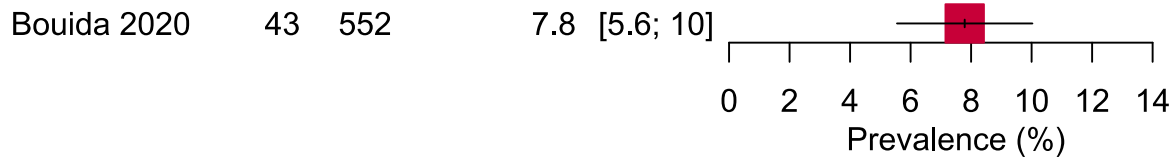

H

**Study ID Cases Total Prevalence 95% C.I.**  
**Drowsiness**

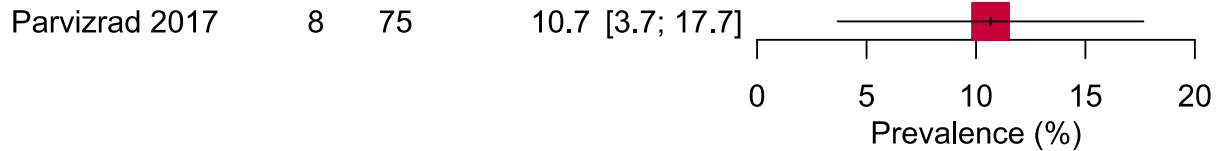

I

**Study ID Cases Total Prevalence 95% C.I.**  
**Euphoria**

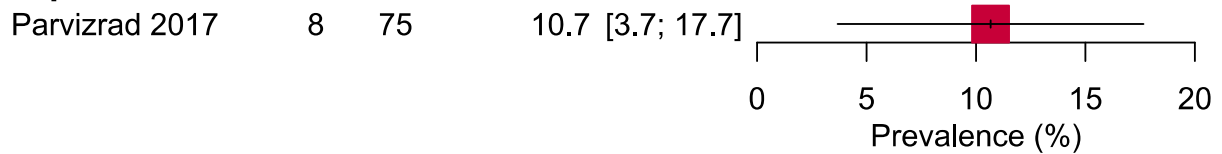

J

**Study ID Cases Total Prevalence 95% C.I.**  
**Headache**

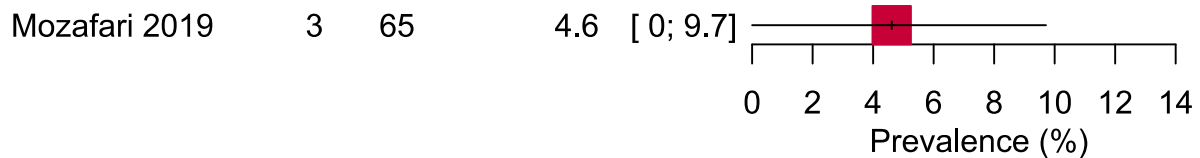

K

**Study ID Cases Total Prevalence 95% C.I.**  
**Hypotension**

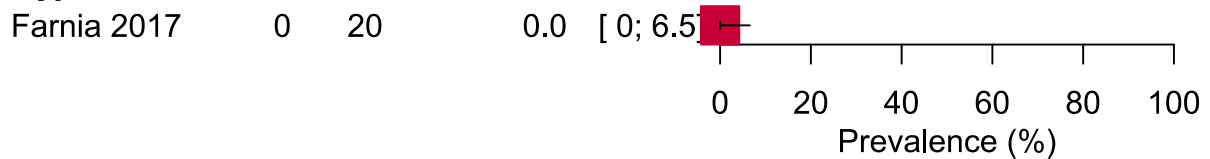

L

**Agitation**

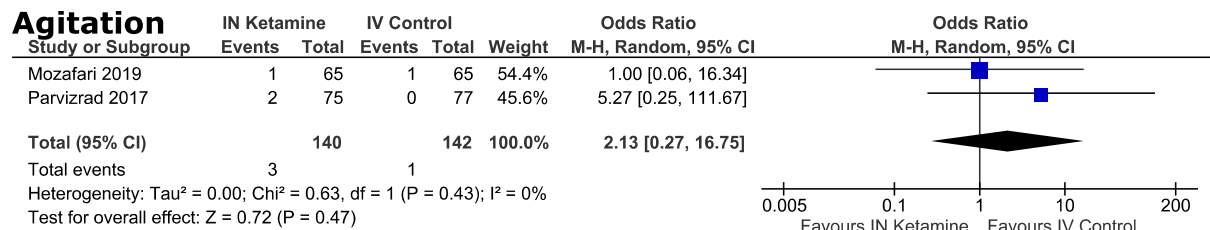

M

**Difficulty Concentrating**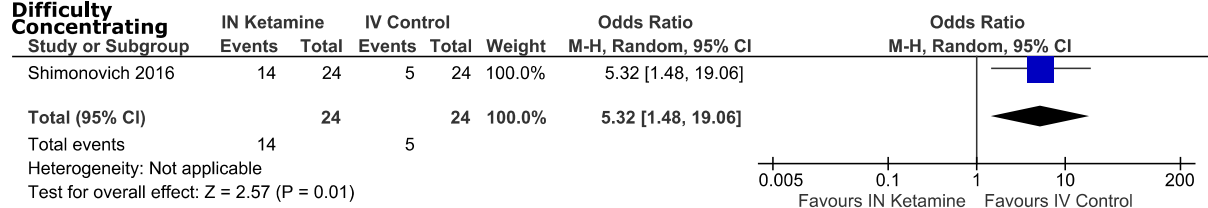

N

**Confusion**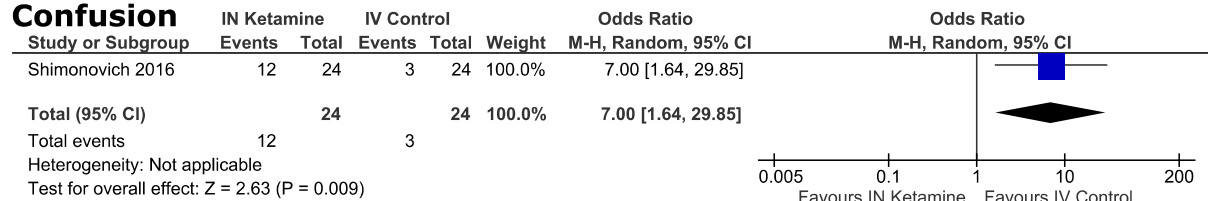

O

**Emergence phenomenon**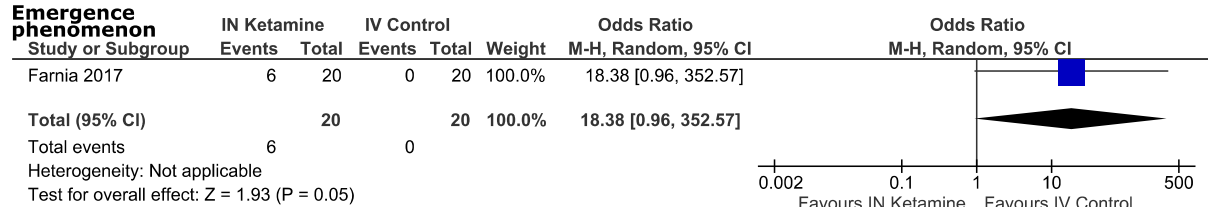

P

**Dry Mouth**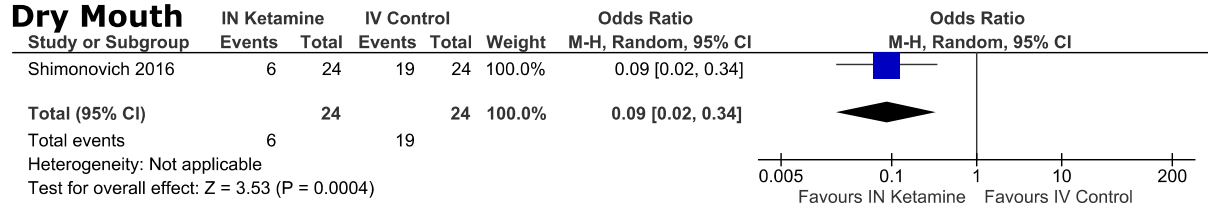

Q

**Fatigue**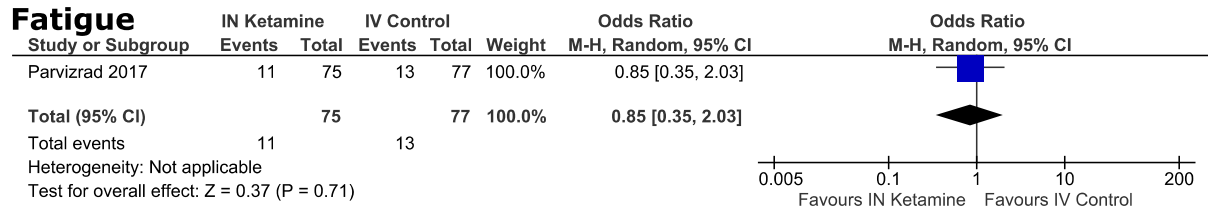

R

**Disorientation**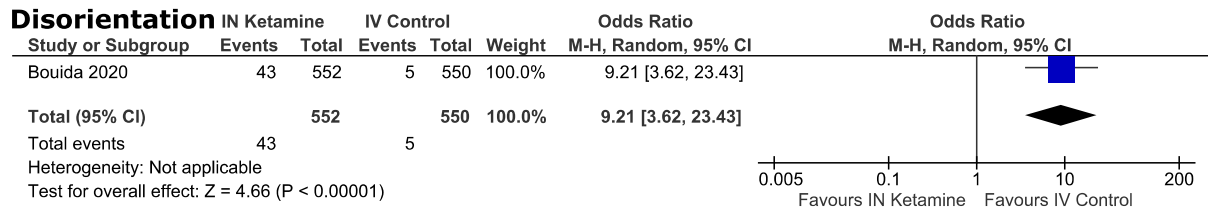

S

**Drowsiness**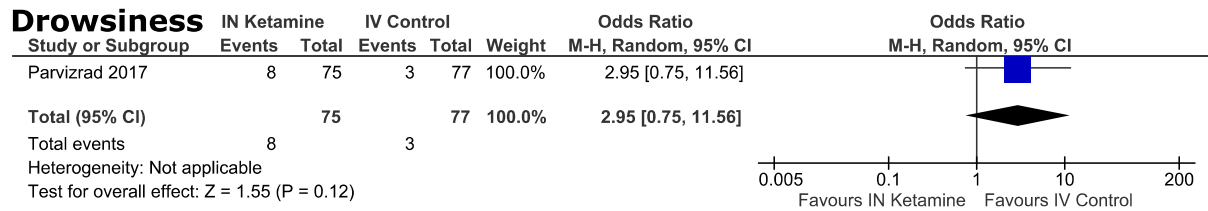

T

**Euphoria**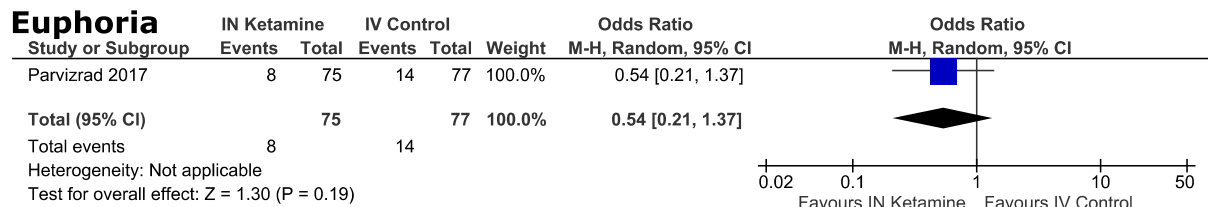

U

**Headache**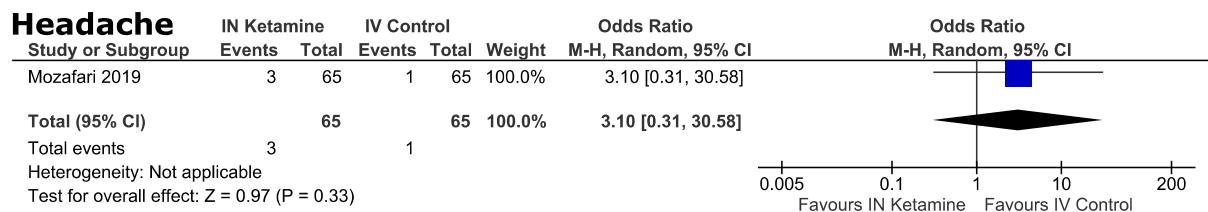

V

**Hypotension**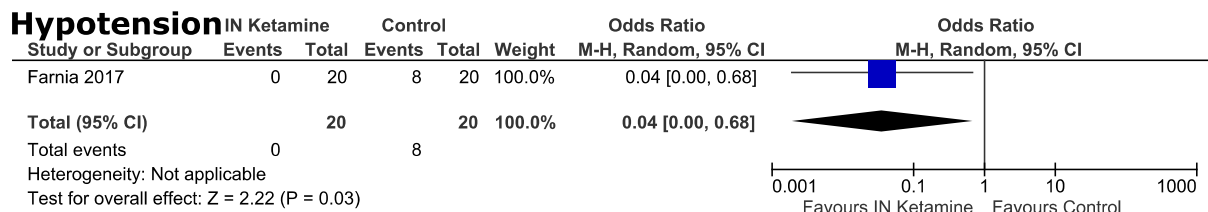**Figure S1.** Prevalence (A-K) and odds ratio (L-V) of adverse events.
