# Supplementary material for: Efficacy and Safety of Intranasal Ketamine for Acute Pain Management in the Emergency Setting: A Systematic Review and Meta-Analysis
Source: MDPI journal article supplement (doi:10.3390/jcm10173978), 2021-09-02
Supplement: s1 [file s1]

**Table S1.** Search strategies.

| <b>Databases</b>         | <b>Search strategies</b>                                                                |
|--------------------------|-----------------------------------------------------------------------------------------|
| <b>PubMed</b>            | ((Ketamine[Title/Abstract]) AND (pain[Title/Abstract])) AND (emergency[Title/Abstract]) |
| <b>Scopus</b>            | TITLE(Ketamine) AND TITLE-ABS-KEY(pain) AND TITLE-ABS-KEY(emergency)                    |
| <b>Google Scholar</b>    | allintitle: ketamine acute pain                                                         |
| <b>Web of Science</b>    | TI=(Ketamine) AND TI=(pain) AND TI=(emergency)                                          |
| <b>Cochrane Database</b> | Record title: Ketamine AND pain AND emergency                                           |
